# Supplementary material for: Community-based surveillance: A scoping review
Source: PubMed Central journal article supplement (PMC6461245; doi:10.1371/journal.pone.0215278), 2019-04-12
Supplement: pone.0215278.s001.pdf [file pone.0215278.s001.pdf]

# Supporting table 1 – Search strategies and results

| Database             | Search date | Search request                                                                                                                                                                                                                                                                                                                                                                                                                                                                                                                                                                                                                                                                                                                                                                                                                                                                                                                                                                                                                                                                               | No. of results | Unique results |
|----------------------|-------------|----------------------------------------------------------------------------------------------------------------------------------------------------------------------------------------------------------------------------------------------------------------------------------------------------------------------------------------------------------------------------------------------------------------------------------------------------------------------------------------------------------------------------------------------------------------------------------------------------------------------------------------------------------------------------------------------------------------------------------------------------------------------------------------------------------------------------------------------------------------------------------------------------------------------------------------------------------------------------------------------------------------------------------------------------------------------------------------------|----------------|----------------|
| Medline              | 28/03/2017  | (("sentinel surveillance"[MeSH Terms] OR "population surveillance"[MeSH Terms] OR "public health surveillance"[MeSH Terms] OR surveillance [Title/Abstract] OR "public health surveillance") AND ("Community-Based Participatory Research"[MeSH Terms] OR "Community-Institutional Relations"[MeSH Terms] OR "Community Health Workers"[MeSH Terms] OR "volunteers" [MeSH Terms]))<br>OR "community-based surveillance"[TIAB] OR "participatory surveillance"[TIAB] OR "household surveillance"[Title/Abstract] OR "community based sentinel surveillance" [TIAB] OR "community based health reporting" [TIAB]                                                                                                                                                                                                                                                                                                                                                                                                                                                                               | 492            | 492            |
| EMBASE               | 05/05/2017  | (surveillance NEAR/3 ('community level' OR 'community based' OR 'community health workers' OR 'lay health' OR 'frontline health' OR 'community directed')):ti,ab<br>OR<br>(surveillance NEAR/9 community NEAR/9 volunteer*):ti,ab,de<br>OR<br>(surveillance NEAR/9 community NEAR/9 'worker'):ti,ab,de<br>OR<br>'health auxiliary'/exp OR 'voluntary worker'/exp OR 'community participation':ti,ab OR 'household based':ti,ab OR 'community reporting':ti,ab OR 'community based':ti,ab OR (('community health' OR 'lay health' OR 'community based' OR 'frontline health') NEAR/2 (worker* OR healer*)):ti,ab<br>AND surveillance:t                                                                                                                                                                                                                                                                                                                                                                                                                                                        | 626            | 626            |
| Global Index Medicus | 19/04/2017  | (tw:("Community-based surveillance")) OR (tw:("Community event based surveillance")) OR (tw:("Community based active surveillance")) OR (tw:("Community based health reporting" )) OR (tw:("Community based vital events reporting" )) OR (tw:("Community based disease reporting" )) OR (tw:("Community based reporting" )) OR (tw:("Community based household surveillance" )) OR (tw:("Community based monitoring")) OR (tw:("Community based disease monitoring")) OR (tw:("Community participatory surveillance"))                                                                                                                                                                                                                                                                                                                                                                                                                                                                                                                                                                      | 224            | 272            |
|                      | 21/04/2017  | ((mh:("community health workers")) AND ((mh:("Population surveillance")) OR (mh:("Public health surveillance")) OR (mh:("Sentinel surveillance")) OR (mh:("Epidemiological surveillance")) OR (mh:("Epidemiological monitoring" )) ) AND (instance:"ghl"))                                                                                                                                                                                                                                                                                                                                                                                                                                                                                                                                                                                                                                                                                                                                                                                                                                   | 61             |                |
| Popline              | 20/04/2017  | (( Title:"community\ -based" OR Title:"community based" OR Title:"community participatory" ))) AND (( surveillance )))                                                                                                                                                                                                                                                                                                                                                                                                                                                                                                                                                                                                                                                                                                                                                                                                                                                                                                                                                                       | 70             |                |
|                      |             | (( "community\ -based" OR "community based" OR "community participatory" ))) AND ((( Title:monitoring OR Title:surveillance )))                                                                                                                                                                                                                                                                                                                                                                                                                                                                                                                                                                                                                                                                                                                                                                                                                                                                                                                                                              | 92             |                |
|                      |             | (( Title:"community based" OR Title:"community\ -based" OR Title:"community participatory" ))) AND ((( Keyword:DATA REPORTING OR Keyword:DATA COLLECTION )))                                                                                                                                                                                                                                                                                                                                                                                                                                                                                                                                                                                                                                                                                                                                                                                                                                                                                                                                 | 122            | 491            |
|                      |             | (( Keyword:COMMUNITY PARTICIPATION OR Keyword:COMMUNITY WORKERS ))) AND ((( Title:surveillance OR Title:monitoring )))                                                                                                                                                                                                                                                                                                                                                                                                                                                                                                                                                                                                                                                                                                                                                                                                                                                                                                                                                                       | 80             |                |
|                      | 21/04/2017  | (( Keyword:COMMUNITY WORKERS ) AND ( Keyword:DATA REPORTING OR Keyword:DATA COLLECTION )))                                                                                                                                                                                                                                                                                                                                                                                                                                                                                                                                                                                                                                                                                                                                                                                                                                                                                                                                                                                                   | 205            |                |
| Cochrane library     | 16/04/2017  | #1 MeSH descriptor: [Population Surveillance] explode all trees<br>#2 MeSH descriptor: [Disease Notification] explode all trees<br>#3 MeSH descriptor: [Epidemiological Monitoring] explode all trees<br>#4 "household surveillance":ti,ab,kw (Word variations have been searched)<br>#5 "health information system":ti,ab,kw (Word variations have been searched)<br>#6 "sentinel surveillance":ti,ab,kw (Word variations have been searched)<br>#7 MeSH descriptor: [Community Networks] explode all trees<br>#8 MeSH descriptor: [Consumer Participation] explode all trees<br>#9 MeSH descriptor: [Community Health Workers] explode all trees<br>#10 MeSH descriptor: [Volunteers] explode all trees<br>#11 "community-based surveillance":ti,ab,kw (Word variations have been searched)<br>#12 "community based monitoring":ti,ab,kw (Word variations have been searched)<br>#13 "community based reporting":ti,ab,kw (Word variations have been searched)<br>#14: #1 or #2 or #3 or #4 or #5 or #6<br>#15: #7 or #8 or #9 or #10<br>#16: #14 and #15<br>#17: #11 or #12 or #13 or #16 | 31             | 31             |
| European library     | 20/04/2017  | "advanced((TITLE,community based)AND(TITLE,surveillance))"                                                                                                                                                                                                                                                                                                                                                                                                                                                                                                                                                                                                                                                                                                                                                                                                                                                                                                                                                                                                                                   | 26             |                |
|                      |             | "advanced((TITLE,community based)AND(TITLE,reporting))"                                                                                                                                                                                                                                                                                                                                                                                                                                                                                                                                                                                                                                                                                                                                                                                                                                                                                                                                                                                                                                      | 2              | 31             |
|                      |             | "community-based surveillance"                                                                                                                                                                                                                                                                                                                                                                                                                                                                                                                                                                                                                                                                                                                                                                                                                                                                                                                                                                                                                                                               | 36             |                |

| Database  | Search date | Search request                                    | No. of results | Unique results |
|-----------|-------------|---------------------------------------------------|----------------|----------------|
| Africabib | 20/04/2017  | ab=community surveillance                         | 14             | 15             |
|           |             | su=surveillance; ti=Community                     | 1              |                |
|           |             | ab=Surveillance; ti=Community                     | 3              |                |
|           |             | ab=Community; ti=surveillance                     | 2              |                |
| Google    | 17/12/2015  | Community-based surveillance                      |                | 18             |
|           | 05/01/2016  | Community event based surveillance filetype:pdf   |                |                |
|           | 06/01/2016  | Community based early warning filetype:pdf        |                |                |
|           | 06/01/2016  | Community based disease surveillance filetype:pdf |                |                |
