# Supplementary material for: Community-based surveillance: A scoping review
Source: PubMed Central journal article supplement (PMC6461245; doi:10.1371/journal.pone.0215278), 2019-04-12
Supplement: pone.0215278.s002.pdf [file pone.0215278.s002.pdf]

# Supporting table 2 – CBS review evidence table

## List of included documents

| Doc Id | Reference                                                                                                                                                                                                                                                                                                                                                               | Type of document  | Term used for CBS                                                                      |
|--------|-------------------------------------------------------------------------------------------------------------------------------------------------------------------------------------------------------------------------------------------------------------------------------------------------------------------------------------------------------------------------|-------------------|----------------------------------------------------------------------------------------|
| 1      | Dyal Chand A, Khale M. A community based surveillance system for perinatal and neonatal care. <i>Indian Pediatr</i> 1989; <b>26</b> : 1115–21.                                                                                                                                                                                                                          | Scientific paper  | Community-based surveillance and monitoring                                            |
| 2      | Asres M, Bisrat F, Kebede Y, Asegedew B, Getachew B, Fantahun M. Knowledge and practice of frontline health workers (Health Extension Workers and Community Volunteer Surveillance Focal Persons) towards acute flaccid paralysis (AFP) case detection and reporting in pastoralist and semi-pastoralist areas of Ethiopia. <i>Ethiop Med J</i> 2013; <b>51</b> : 51–7. | Scientific paper  | Community-based surveillance                                                           |
| 3      | Bisimwa G, Mambo T, Mitangala P, Schirvel C, Porignon D, Dramaix M, et al. Nutritional monitoring of preschool-age children by community volunteers during armed conflict in the Democratic Republic of the Congo. <i>Food Nutr Bull</i> 2009; <b>30</b> : 120–7.                                                                                                       | Scientific paper  | No term                                                                                |
| 4      | Deepa TM, Venkata Rao E, Patil RR, Samuel R. Operational feasibility of establishing community reporting systems. <i>Natl Med J India</i> 2008; <b>21</b> : 166–70.                                                                                                                                                                                                     | Scientific paper  | Community reporting system                                                             |
| 5      | Dil Y, Strachan D, Cairncross S, Korkor AS, Hill Z. Motivations and challenges of community-based surveillance volunteers in the northern region of Ghana. <i>J Community Health</i> 2012; <b>37</b> : 1192–8.                                                                                                                                                          | Scientific paper  | Community-based surveillance                                                           |
| 6      | Hashimoto K, Zúniga C, Nakamura J, Hanada K. Integrating an infectious disease programme into the primary health care service: a retrospective analysis of Chagas disease community-based surveillance in Honduras. <i>BMC Health Serv Res</i> 2015. DOI 10.1186/s12913-015-0785-4                                                                                      | Scientific paper  | Community-based vector surveillance<br>Community-based surveillance                    |
| 7      | Kilonzo A, Kouletio M, Whitehead SJ, Curtis KM, McCarthy BJ. Improving surveillance for maternal and perinatal health in 2 districts of rural Tanzania. <i>Am J Public Health</i> 2001; <b>91</b> : 1636–40.                                                                                                                                                            | Scientific paper  | Community-based surveillance                                                           |
| 8      | Kok MC, Muula AS. Motivation and job satisfaction of health surveillance assistants in Mwanza, Malawi: an explorative study. <i>Malawi Med J</i> 2013; <b>25</b> : 5–11.                                                                                                                                                                                                | Scientific paper  | No term                                                                                |
| 9      | Dinku B, Kumie A, Bisrat F. Linking community volunteer surveillance focal persons with health extension workers on polio surveillance. <i>Ethiop Med J</i> 2013; <b>51</b> : 71–6.                                                                                                                                                                                     | Scientific paper  | Community-based acute flaccid paralysis-Measles and Neonatal Tetanus (NT) surveillance |
| 10     | Okanurak K, Sornmani S, Chitprapop U. The role of folk healers in the malaria volunteer program in Thailand. <i>Southeast Asian J Trop Med Public Health</i> 1991; <b>22</b> : 57–64.                                                                                                                                                                                   | Scientific paper  | No term                                                                                |
| 11     | Wójcik OP, Brownstein JS, Chunara R, Johansson MA. Public health for the people: participatory infectious disease surveillance in the digital age. <i>Emerging themes in epidemiology</i> 2014; <b>11</b> : 7.                                                                                                                                                          | Scientific paper  | Internet-based participatory surveillance                                              |
| 12     | Ngirabega JDD, Hakizimana C, Wendy L, Munyanshongore C, Donnen P, Dramaix-Wilmet M. Reliability of anthropometric measurements performed by community nutrition workers in a community-based pediatric growth-monitoring program in rural Rwanda. <i>Rev Epidemiol Sante Publique</i> 2010; <b>58</b> : 409–14.                                                         | Scientific paper  | No term                                                                                |
| 13     | Bose A, Sandal Sejbaek C, Suganthy P, Raghava V, Alex R, Muliylil J, et al. Self-harm and self-poisoning in southern India: choice of poisoning agents and treatment. <i>Trop Med Int Health</i> 2009; <b>14</b> : 761–5.                                                                                                                                               | Scientific paper  | Community-based surveillance                                                           |
| 14     | Afele M. Volunteers vital for counting births and deaths in Ghana. <i>Bulletin of the World Health Organization</i> 2011; <b>89</b> : 322–3.                                                                                                                                                                                                                            | Scientific paper  | Community-based surveillance                                                           |
| 15     | Hashimoto K, Yoshioka K. Review: surveillance of Chagas disease. <i>Adv Parasitol</i> 2012; <b>79</b> : 375–428.                                                                                                                                                                                                                                                        | Book chapter      | Community-based surveillance                                                           |
| 16     | Integrated disease surveillance and response in the African Region: a guide for establishing community based surveillance. Brazzaville: World Health Organization Regional Office for Africa, 2014.                                                                                                                                                                     | Guidance document | Community-based surveillance                                                           |
| 17     | Evaluation of the functionality and effectiveness of community event based surveillance in Sierra Leone. UKaid and Ebola Response Consortium, 2015.                                                                                                                                                                                                                     | Report            | Community event-based surveillance                                                     |
| 18     | Integrated Diseases Surveillance and Response in the African Region. Community-based Surveillance (CBS) Training Manual. Brazzaville: World Health Organization Regional Office for Africa, 2015.                                                                                                                                                                       | Training manual   | Community-based surveillance                                                           |

| Doc Id | Reference                                                                                                                                                                                                                                                                                                                                                           | Type of document | Term used for CBS                                                      |
|--------|---------------------------------------------------------------------------------------------------------------------------------------------------------------------------------------------------------------------------------------------------------------------------------------------------------------------------------------------------------------------|------------------|------------------------------------------------------------------------|
| 19     | Lado M, Mackoy S, Steve B, Rumunu J. Evaluation of community-based surveillance for Guinea worm, South Sudan, 2006. <i>SSMJ</i> 2012; <b>5</b> : 72–4.                                                                                                                                                                                                              | Scientific paper | Community-based surveillance                                           |
| 20     | Quarterly report “Community event-based surveillance (CEBS) in Sierra Leone.” International Rescue Committee Sierra Leone Program; 2015.                                                                                                                                                                                                                            | Report           | Community event-based surveillance                                     |
| 21     | Standard Operating Procedure for community event-based surveillance for Ebola virus disease in Sierra Leone. New York: International Rescue Committee, 2015.                                                                                                                                                                                                        | SOPs             | Community event-based surveillance                                     |
| 22     | Brieger WR, Kendall C. The Yoruba farm market as a communication channel in guinea worm disease surveillance. <i>Soc Sci Med</i> 1996; <b>42</b> : 233–43.                                                                                                                                                                                                          | Scientific paper | Community-based surveillance<br>Market-based surveillance              |
| 23     | Hashimoto K, Alvarez H, Nakagawa J, Juarez J, Monroy C, Córdón-Rosales C, et al. Vector control intervention towards interruption of transmission of Chagas disease by <i>Rhodnius prolixus</i> , main vector in Guatemala. <i>Mem Inst Oswaldo Cruz</i> 2012; <b>107</b> : 877–87.                                                                                 | Scientific paper | Community-based surveillance                                           |
| 24     | Hii JL, Chee KC, Vun YS, Awang J, Chin KH, Kan SK. Sustainability of a successful malaria surveillance and treatment program in a Runggus community in Sabah, east Malaysia. <i>Southeast Asian J Trop Med Public Health</i> 1996; <b>27</b> : 512–21.                                                                                                              | Scientific paper | Community-based malaria surveillance<br>Community surveillance         |
| 25     | Kyei-Faried S, Appiah-Denkyira E, Brenya D, Akuamo-Boateng A, Visser L. The Role of Community-Based Surveillance in Health Outcomes Measurement. <i>Ghana Med J</i> 2006; <b>40</b> : 26–30.                                                                                                                                                                        | Scientific paper | Community-based surveillance                                           |
| 26     | Lapau B. The role of village malaria workers as village surveillance agents in Bekasi Regency, Indonesia. <i>Southeast Asian J Trop Med Public Health</i> 1983; <b>14</b> : 12–7.                                                                                                                                                                                   | Scientific paper | No term                                                                |
| 27     | Nonaka D, Pongvongsa T, Nishimoto F, Nansounthavong P, Hongwei J, Vongsouvanh A, et al. Successful mobile phone network-based approach to integration of the health care system in rural Laos: strengthening lay health worker performance. <i>Rural Remote Health</i> 2014; <b>14</b> : 2588.                                                                      | Scientific paper | Community-based surveillance                                           |
| 28     | Nsona H, Mtimuni A, Daelmans B, Callaghan-Koru JA, Gilroy K, Mgalula L, et al. Scaling up integrated community case management of childhood illness: update from Malawi. <i>Am J Trop Med Hyg</i> 2012; <b>87</b> : 54–60.                                                                                                                                          | Scientific paper | No term                                                                |
| 29     | Paolotti D, Carnahan A, Colizza V, Eames K, Edmunds J, Gomes G, et al. Web-based participatory surveillance of infectious diseases: the Influenzanet participatory surveillance experience. <i>Clin Microbiol Infect</i> 2014; <b>20</b> : 17–21.                                                                                                                   | Scientific paper | No term                                                                |
| 30     | Purdin S, Spiegel P, Mack KP, Millen J. Surveillance beyond camp settings in humanitarian emergencies: findings from the Humanitarian Health Information Management Working Group. <i>Prehosp Disaster Med</i> 2009; <b>24</b> : s202–205.                                                                                                                          | Scientific paper | Community-based surveillance<br>Community-based information collection |
| 31     | Ramsey K, Hingora A, Kante M, Jackson E, Exavery A, Pemba S, et al. The Tanzania Connect Project: a cluster-randomized trial of the child survival impact of adding paid community health workers to an existing facility-focused health system. <i>BMC Health Serv Res</i> 2013; <b>13</b> : S6.                                                                   | Scientific paper | No term                                                                |
| 32     | Ruebush TK, Weller SC, Klein RE. Qualities of an ideal volunteer community malaria worker: a comparison of the opinions of community residents and national malaria service staff. <i>Soc Sci Med</i> 1994; <b>39</b> : 123–31.                                                                                                                                     | Scientific paper | No term                                                                |
| 33     | Smith S, Deveridge A, Berman J, Negin J, Mwambene N, Chingaipe E, et al. Task-shifting and prioritization: a situational analysis examining the role and experiences of community health workers in Malawi. <i>Hum Resour Health</i> 2014; <b>12</b> : 24.                                                                                                          | Scientific paper | No term                                                                |
| 34     | Waiswa P, Peterson SS, Namazzi G, Ekirapa EK, Naikoba S, Byaruhanga R, et al. The Uganda Newborn Study (UNEST): an effectiveness study on improving newborn health and survival in rural Uganda through a community-based intervention linked to health facilities - study protocol for a cluster randomized controlled trial. <i>Trials</i> 2012; <b>13</b> : 213. | Scientific paper | No term                                                                |
| 35     | Cerón A, Ortiz MR, Álvarez D, Palmer GH, Córdón-Rosales C. Local disease concepts relevant to the design of a community-based surveillance program for influenza in rural Guatemala. <i>Int J Equity Health</i> 2016; <b>15</b> : 69.                                                                                                                               | Scientific paper | Community-based surveillance                                           |
| 36     | Brookes VJ, Kennedy E, Dhagapan P, Ward MP. Qualitative Research to Design Sustainable Community-Based Surveillance for Rabies in Northern Australia and Papua New Guinea. <i>Front Vet Sci</i> 2017; <b>4</b> : 19.                                                                                                                                                | Scientific paper | Community-based surveillance                                           |
| 37     | Chaki PP, Mlacha Y, Msellemu D, Muhili A, Malishee AD, Mtema ZJ, et al. An affordable, quality assured community-based system for high-resolution entomological surveillance of vector mosquitoes that reflects human malaria infection risk patterns. <i>Malaria J</i> 2012; <b>11</b> : 172.                                                                      | Scientific paper | Community-based surveillance                                           |

| Doc Id | Reference                                                                                                                                                                                                                                                                            | Type of document  | Term used for CBS                                            |
|--------|--------------------------------------------------------------------------------------------------------------------------------------------------------------------------------------------------------------------------------------------------------------------------------------|-------------------|--------------------------------------------------------------|
| 38     | Abad-Franch F, Vega MC, Rolón MS, Santos WS, Rojas de Arias A. Community participation in Chagas disease vector surveillance: systematic review. <i>PLoS Negl Trop Dis</i> 2011; <b>5</b> : e1207.                                                                                   | Scientific paper  | No term                                                      |
| 39     | Bowden S, Braker K, Checchi F, Wong S. Implementation and utilisation of community-based mortality surveillance: a case study from Chad. <i>Confl Health</i> 2012; <b>6</b> : 11.                                                                                                    | Scientific paper  | Community-based mortality surveillance                       |
| 40     | Chau PD. Evaluation of Disease Surveillance System to Detect Disease Outbreak in Cambodia. <i>J. Natl. Inst. Public Health</i> 2007; <b>56</b> : 412.                                                                                                                                | Scientific paper  | Community-based surveillance                                 |
| 41     | Crowe S, Hertz D, Maenner M, Ratnayake R, Baker P, Lash RR, et al. A plan for Community Event-Based Surveillance to Reduce Ebola Transmission — Sierra Leone, 2014–2015. <i>Morbidity and Mortality Weekly Report</i> 2015; <b>64</b> : 70–3.                                        | Scientific paper  | Community event-based surveillance                           |
| 42     | Maes EF, Zimicki S. An evaluation of community-based surveillance in the northern region of Ghana. UNICEF, 2000.                                                                                                                                                                     | Report            | Community-based surveillance                                 |
| 43     | Okiror SO, Bisrat F, Lutukai M, Bhui BR. Community-based surveillance on polio eradication in the Horn of Africa. <i>African Health Monitor</i> 2015; <b>19</b> : 44–5.                                                                                                              | Scientific paper  | Community-based surveillance                                 |
| 44     | Wendy Morotti, Briac V, Papowitz H. Community-Based Pandemic Preparedness. Multi-sectorial actions for safer, healthier and more resilient communities.                                                                                                                              | Report            | Community-based early warning and surveillance               |
| 45     | A Guide to Establishing Event-based Surveillance. Manila: World Health Organization Western Pacific Region, 2008.                                                                                                                                                                    | Guidance document | No term                                                      |
| 46     | Abass KM, Werf TS van der, Phillips RO, Sarfo FS, Abotsi J, Mireku SO, et al. Buruli ulcer control in a highly endemic district in Ghana: role of community-based surveillance volunteers. <i>Am J Trop Med Hyg</i> 2015; <b>92</b> : 115–7.                                         | Scientific paper  | No term                                                      |
| 47     | Anselmi M, Moreira J-M, Caicedo C, Guderian R, Tognoni G. Community participation eliminates yaws in Ecuador. <i>Trop Med Int Health</i> 2003; <b>8</b> : 634–8.                                                                                                                     | Scientific paper  | Community-based surveillance                                 |
| 48     | Bajardi P, Vespignani A, Funk S, Eames KT, Edmunds WJ, Turbelin C, et al. Determinants of follow-up participation in the Internet-based European influenza surveillance platform Influenzanet. <i>J Med Internet Res</i> 2014; <b>16</b> : e78.                                      | Scientific paper  | Internet-based community surveillance                        |
| 49     | Cairncross S, Braide EI, Bugri SZ. Community participation in the eradication of guinea worm disease. <i>Acta Trop</i> 1996; <b>61</b> : 121–36.                                                                                                                                     | Scientific paper  | Village-based surveillance<br>Community-based surveillance   |
| 50     | Choi Y, El Arifeen S, Mannan I, Rahman SM, Bari S, Darmstadt GL, et al. Can mothers recognize neonatal illness correctly? Comparison of maternal report and assessment by community health workers in rural Bangladesh. <i>Trop Med Int Health</i> 2010; <b>15</b> : 743–53.         | Scientific paper  | No term                                                      |
| 51     | Cox J, Dy Soley L, Bunkea T, Sovannaroth S, Soy Ty K, Ngak S, et al. Evaluation of community-based systems for the surveillance of day three-positive Plasmodium falciparum cases in Western Cambodia. <i>Malar J</i> 2014; <b>13</b> : 282.                                         | Scientific paper  | Community-based surveillance                                 |
| 52     | Cwik MF, Barlow A, Goklish N, Larzelere-Hinton F, Tingey L, Craig M, et al. Community-Based Surveillance and Case Management for Suicide Prevention: An American Indian Tribally Initiated System. <i>Am J Public Health</i> 2014; <b>104</b> : e18–23.                              | Scientific paper  | Community-based surveillance                                 |
| 53     | Darmstadt G, El Arifeen S, Choi Y, Bari S, Rahman S, Mannan I, et al. Household surveillance of severe neonatal illness by community health workers in Mirzapur, Bangladesh: coverage and compliance with referral. <i>Health policy and planning</i> 2010; <b>25</b> : 112–24.      | Scientific paper  | No term                                                      |
| 54     | Goutard FL, Binot A, Duboz R, Rasamoelina-Andriamanivo H, Pedrono M, Holl D, et al. How to reach the poor? Surveillance in low-income countries, lessons from experiences in Cambodia and Madagascar. <i>Prev Vet Med</i> 2015; <b>120</b> : 12–26.                                  | Scientific paper  | No term                                                      |
| 55     | Imourou BCA, Perini P, Sohounké L, Ahanhanzo C. Surveillance en communauté des décès maternels et infantile dans le district sanitaire de Tanguéta (Bénin) de 2006 à 2010. <i>Med Sante Trop</i> 2013; <b>23</b> : 332–6.                                                            | Scientific paper  | No term                                                      |
| 56     | Kaneko A. A community-directed strategy for sustainable malaria elimination on islands: short-term MDA integrated with ITNs and robust surveillance. <i>Acta Trop</i> 2010; <b>114</b> : 177–83.                                                                                     | Scientific paper  | Community-based surveillance                                 |
| 57     | Mangklariri R, Pichaiapat V, Varavithya W. Effectiveness of diarrhoeal diseases surveillance by village health volunteer. <i>J Med Assoc Thai</i> 1986; <b>69</b> : 91–3.                                                                                                            | Scientific paper  | No term                                                      |
| 58     | Moshabela M, Sene M, Nanne I, Tankoano Y, Schaefer J, Niang O, et al. Early detection of maternal deaths in Senegal through household-based death notification integrating verbal and social autopsy: a community-level case study. <i>BMC Health Serv Res</i> 2015; <b>15</b> : 16. | Scientific paper  | Community-level surveillance<br>Community-based surveillance |

| Doc Id | Reference                                                                                                                                                                                                                                                                                                               | Type of document | Term used for CBS                                                                                                       |
|--------|-------------------------------------------------------------------------------------------------------------------------------------------------------------------------------------------------------------------------------------------------------------------------------------------------------------------------|------------------|-------------------------------------------------------------------------------------------------------------------------|
| 59     | N’Goran AA, Ilunga N, Coldiron ME, Grais RF, Porten K. Community-based measles mortality surveillance in two districts of Katanga Province, Democratic Republic of Congo. <i>BMC Res Notes</i> 2013; <b>6</b> : 537.                                                                                                    | Scientific paper | Community-based measles mortality surveillance                                                                          |
| 60     | Oum S, Chandramohan D, Cairncross S. Community-based surveillance: a pilot study from rural Cambodia. <i>Trop Med Int Health</i> 2005; <b>10</b> : 689–97.                                                                                                                                                              | Scientific paper | Community-based surveillance                                                                                            |
| 61     | Pongvongsa T, Nonaka D, Kobayashi J, Mizoue T, Phongmany P, Moji K. Determinants of monthly reporting by village health volunteers in a poor rural district of Lao PDR. <i>Southeast Asian J Trop Med Public Health</i> 2011; <b>42</b> : 1269–81.                                                                      | Scientific paper | Community-based surveillance                                                                                            |
| 62     | Pyakurel R, Sharma N, Paudel D, Coghill A, Sindén L, Bost L, et al. Cause of Death in Women of Reproductive Age in Rural Nepal Obtained Through Community-Based Surveillance: Is Reducing Maternal Mortality the Right Priority for Women’s Health Programs? <i>Health Care Women Int</i> 2015; <b>36</b> : 655–62.     | Scientific paper | Community-based health information system                                                                               |
| 63     | Ruebush TK, Godoy HA. Community participation in malaria surveillance and treatment. I. The Volunteer Collaborator Network of Guatemala. <i>Am J Trop Med Hyg</i> 1992; <b>46</b> : 248–60.                                                                                                                             | Scientific paper | No term                                                                                                                 |
| 64     | Ruebush TK, Zeissig R, Koplán JP, Klein RE, Godoy HA. Community participation in malaria surveillance and treatment. III. An evaluation of modifications in the Volunteer Collaborator Network of Guatemala. <i>Am J Trop Med Hyg</i> 1994; <b>50</b> : 85–98.                                                          | Scientific paper | No term                                                                                                                 |
| 65     | Sharma R, Ratnesh L, Karad AB, Kandpal H, Dhariwal AC, Ichhupujani RL. Communicable disease outbreak detection by using supplementary tools to conventional surveillance methods under Integrated Disease Surveillance Project (IDSP). <i>India. J Commun Dis</i> 2009; <b>41</b> : 149–59.                             | Scientific paper | Community-based surveillance                                                                                            |
| 66     | Assessment of the Community-Based Surveillance System in Ghana and its role in dracunculiasis eradication. <i>Wkly Epidemiol Rec</i> 2003; <b>78</b> : 321–3.                                                                                                                                                           | Scientific paper | Community-based surveillance                                                                                            |
| 67     | Joos O, Silva R, Amouzou A, Moulton LH, Perin J, Bryce J, et al. Evaluation of a mHealth Data Quality Intervention to Improve Documentation of Pregnancy Outcomes by Health Surveillance Assistants in Malawi: A Cluster Randomized Trial. <i>PLoS ONE</i> 2016; <b>11</b> : e014538.                                   | Scientific paper | Community-based vital event documentation                                                                               |
| 68     | Larsen DA, Chisha Z, Winters B, Mwanza M, Kamuliwo M, Mbwili C, et al. Malaria surveillance in low-transmission areas of Zambia using reactive case detection. <i>Malar J</i> 2015; <b>14</b> : 465.                                                                                                                    | Scientific paper | No term                                                                                                                 |
| 69     | Leal-Neto OB, Dimech GS, Libel M, Oliveira W, Ferreira JP. Digital disease detection and participatory surveillance: overview and perspectives for Brazil. <i>Rev Saude Publica</i> 2016; <b>50</b> : 17.                                                                                                               | Scientific paper | No term                                                                                                                 |
| 70     | Meyers DJ, Ozonoff A, Baruwál A, Pande S, Harsha A, Sharma R, et al. Combining Healthcare-Based and Participatory Approaches to Surveillance: Trends in Diarrheal and Respiratory Conditions Collected by a Mobile Phone System by Community Health Workers in Rural Nepal. <i>PLoS ONE</i> 2016; <b>11</b> : e0152738. | Scientific paper | Community health worker based surveillance                                                                              |
| 71     | Mitsunaga T, Hedt-Gauthier BL, Ngizwenayo E, Farmer DB, Gaju E, Drobac P, et al. Data for Program Management: An Accuracy Assessment of Data Collected in Household Registers by Community Health Workers in Southern Kayonza, Rwanda. <i>J Community Health</i> 2015; <b>40</b> : 625–32.                              | Scientific paper | No term                                                                                                                 |
| 72     | Pagliari, Claudia, and Santosh Vijaykumar. Digital Participatory Surveillance and the Zika Crisis: Opportunities and Caveats. <i>PLoS Neglected Tropical Diseases</i> 2016; <b>10</b> : e0004795                                                                                                                        | Scientific paper | Digital participatory surveillance                                                                                      |
| 73     | Pini A, Merk H, Carnahan A, Galanis I, VAN Straten E, Danis K, et al. High added value of a population-based participatory surveillance system for community acute gastrointestinal, respiratory and influenza-like illnesses in Sweden, 2013-2014 using the web. <i>Epidemiol Infect</i> 2017; <b>145</b> : 1193-202.  | Scientific paper | No term                                                                                                                 |
| 74     | Ratnayake R, Crowe SJ, Jasperse J, Privette G, Stone E, Miller L, et al. Assessment of Community Event-Based Surveillance for Ebola Virus Disease, Sierra Leone, 2015. <i>Emerging Infect Dis</i> 2016; <b>22</b> : 1431–7.                                                                                             | Scientific paper | Community event-based surveillance                                                                                      |
| 75     | Silva R, Amouzou A, Munos M, Marsh A, Hazel E, Victora C, et al. Can Community Health Workers Report Accurately on Births and Deaths? Results of Field Assessments in Ethiopia, Malawi and Mali. <i>PLoS ONE</i> 2016; <b>11</b> : e0144662.                                                                            | Scientific paper | Community-based vital events reporting                                                                                  |
| 76     | Chorlton R. Improving child survival and nutrition: the joint WHO/UNICEF Nutrition Support Programme in Iringa, Tanzania. Dar es Salaam: UNICEF, 1989.                                                                                                                                                                  | Scientific paper | Community-based growth monitoring<br>Village-based monitoring,<br>Village-based nutritional status and death monitoring |
| 77     | Meyers DJ, Filkins M, Bangura AH, Sharma R, Baruwál A, Pande S, et al. Management challenges in mHealth: Failures of a mobile community health worker surveillance programme in rural Nepal. <i>BMJ Innov</i> 2017; <b>3</b> : 19–25                                                                                    | Scientific paper | No term                                                                                                                 |

| Doc Id | Reference                                                                                                                                                                                                                                                                       | Type of document  | Term used for CBS                          |
|--------|---------------------------------------------------------------------------------------------------------------------------------------------------------------------------------------------------------------------------------------------------------------------------------|-------------------|--------------------------------------------|
| 78     | Bugri DS. Community-based surveillance in Ghana. National surveillance unit, 2005.                                                                                                                                                                                              | Report            | Community-based surveillance               |
| 79     | Shayo E, Mboera LEG, MMBuji P, Rumisha SF, Senkoro KP, Mwami AJ. The role of community and traditional healers in communicable disease surveillance and management in Babati and Dodoma Districts, Tanzania. <i>Tanzania Health Research Bulletin</i> 2003; <b>5</b> : 48–55.   | Scientific paper  | Community-based disease surveillance       |
| 80     | Chaki PP, Dongus S, Fillinger U, Kelly A, Killeen GF. Community-owned resource persons for malaria vector control: enabling factors and challenges in an operational programme in Dar es Salaam, United Republic of Tanzania. <i>Hum Resour Health</i> 2011; <b>9</b> : 21.     | Scientific paper  | Community-based surveillance               |
| 81     | Joos O, Amouzou A, Silva R, Banda B, Park L, Bryce J, et al. Strengthening Community-Based Vital Events Reporting for Real-Time Monitoring of Under-Five Mortality: Lessons Learned from the Balaka and Salima Districts in Malawi. <i>PLoS One</i> 2016; <b>11</b> : e0145238. | Scientific paper  | Community-based monitoring                 |
| 82     | Munos MK, Koffi AK, Sangho H, Traoré MG, Diakité M, Silva R. Strengthening Community Networks for Vital Event Reporting: Community-Based Reporting of Vital Events in Rural Mali. <i>PLoS One</i> 2015; <b>10</b> : e0132164.                                                   | Scientific paper  | Community-based vital events reporting     |
| 83     | Stone E, Miller L, Jasperse J, et al. Community Event-Based Surveillance for Ebola Virus Disease in Sierra Leone: Implementation of a National-Level System During a Crisis. <i>PLoS Curr.</i> 2016; <b>8</b> : ecurrents.outbreaks.d119c71125b5cce312b9700d744c56d8.           | Scientific paper  | Community event-based surveillance         |
| 84     | Ahmed AEAM, Ahmed IAM. Nutrition surveillance in the Sudan: a community-based approach. <i>East Mediterranean Health Journal</i> 1996; <b>2</b> : 229–35.                                                                                                                       | Scientific paper  | No term                                    |
| 85     | Ebola and Marburg virus disease epidemics: preparedness, alert, control, and evaluation. Geneva: World Health Organization, 2014.                                                                                                                                               | Scientific paper  | Community-based surveillance               |
| 86     | Role of village health volunteers in avian influenza surveillance in Thailand. New Delhi: World Health Organization Regional Office for South-East Asia, 2007.                                                                                                                  | Report            | Community-based surveillance               |
| 87     | Amaral J, Leite AJM, Cunha AJLA, Victora CG. Impact of IMCI health worker training on routinely collected child health indicators in Northeast Brazil. <i>Health Policy Plann</i> 2005; <b>20</b> : i42–8.                                                                      | Scientific paper  | Community health worker information system |
| 88     | Bellali H, Hchaichi A, Harizi C, Mrabet A, Chahed MK. Comparison between active surveillance and passive detection of zoonotic cutaneous leishmaniasis in endemic rural areas in Central Tunisia, 2009 to 2014. <i>Asian Pac J Trop Dis</i> 2015; <b>5</b> : 515–9.             | Scientific paper  | Community-based active ZCL surveillance    |
| 89     | Fauveau V., Chakraborty J., Sarder A.M., Khan M.A., Koenig M.A. Measles among under- 9-month-olds in rural Bangladesh: Its significance for age at immunization. <i>BULL WHO</i> 1991; <b>69</b> : 67–72.                                                                       | Scientific paper  | Community-based measles surveillance       |
| 90     | García-Zapata MT, Marsden PD. Chagas' disease: control and surveillance through use of insecticides and community participation in Mambái, Goiás, Brazil. <i>Bull Pan Am Health Organ</i> 1993; <b>27</b> : 265–79.                                                             | Scientific paper  | No term                                    |
| 91     | Hashimoto K, Zúniga C, Romero E, Morales Z, Maguire JH. Determinants of health service responsiveness in community-based vector surveillance for Chagas disease in Guatemala, El Salvador, and Honduras. <i>PLoS Negl Trop Dis</i> 2015; <b>9</b> : e0003974.                   | Scientific paper  | Community-based vector surveillance        |
| 92     | Kim SY, Rochat R, Rajaratnam A, Digirolamo A. Evaluating completeness of maternal mortality reporting in a rural health and social affairs unit in Vellore, India, 2004. <i>J Biosoc Sci</i> 2009; <b>41</b> : 195–205.                                                         | Scientific paper  | Community-based death surveillance         |
| 93     | Materia E, Mele A, Mehari W, Rosmini F, Stazi MA, Damen HM, et al. Estimation of early childhood mortality using preceding birth technique in a community-based setting. <i>Ann Ist Super Sanita</i> 1993; <b>29</b> : 465–7.                                                   | Scientific paper  | No term                                    |
| 94     | Ndiaye SM, Quick L, Sanda O, Niandou S. The value of community participation in disease surveillance: A case study from Niger. <i>Health Promot Int</i> 2003; <b>18</b> : 89–98.                                                                                                | Scientific paper  | Community-based surveillance               |
| 95     | Parente CC, Bezerra FSM, Parente PI, Dias-Neto RV, Xavier SCC, Ramos AN, et al. Community-based entomological surveillance reveals urban foci of chagas disease vectors in Sobral, State of Ceara, Northeastern Brazil. <i>PLoS ONE</i> 2017; <b>12</b> : e0170278.             | Scientific paper  | Community-based entomological surveillance |
| 96     | Handbook for community surveillance coordinators to support community participation in detection and prevention of polio and other diseases. Version 2. Washington, D.C: Academy for Educational Development, CHANGE Project, 2001.                                             | Guidance document | Community surveillance                     |
| 97     | Amouzou A, Kidanu A, Tadesse N, Silva R, Hazel E, Bryce J, et al. Using Health Extension Workers for Monitoring Child Mortality in Real-Time: Validation against Household Survey Data in Rural Ethiopia. <i>PLoS One</i> 2015; <b>10</b> : e0126909.                           | Scientific paper  | Community monitoring of vital events       |
| 98     | Barnett I, Yosellina, Sulisty S, Befani B, KariSari K, Sharmin S, et al. Mixed-method impact evaluation of a mobile phone application for nutrition monitoring                                                                                                                  | Report            | Community-based growth monitoring          |

| Doc Id | Reference                                                                                                                                                                                                                                                                                 | Type of document | Term used for CBS                                                                                 |
|--------|-------------------------------------------------------------------------------------------------------------------------------------------------------------------------------------------------------------------------------------------------------------------------------------------|------------------|---------------------------------------------------------------------------------------------------|
|        | in Indonesia. Institute for Development Studies, 2016.                                                                                                                                                                                                                                    |                  |                                                                                                   |
| 99     | Edward A, Ernst P, Taylor C, Becker S, Mazive E. Examining the evidence of under-five mortality reduction in a community-based programme in Gaza, Mozambique. <i>Transactions of the Royal Society of Tropical Medicine and Hygiene</i> 2007; <b>101</b> : 814–22.                        | Scientific paper | Community-based vital registration<br>Community-based vital registration and disease surveillance |
| 100    | Freund P, Kalumba K. Information for health development. <i>World Health Forum</i> 1986; <b>7</b> : 185–90.                                                                                                                                                                               | Scientific paper | Community-based information gathering                                                             |
| 101    | Gisore P, Shipala E, Otieno K, Rono B, Marete I, Tenge C, et al. Community based weighing of newborns and use of mobile phones by village elders in rural settings in Kenya: a decentralised approach to health care provision. <i>BMC Pregnancy and Childbirth</i> 2012; <b>12</b> : 15. | Scientific paper | No term                                                                                           |
| 102    | Hopkins D, Ruiz-Tiben E. Surveillance for dracunculiasis, 1981-1991. <i>Morbidity and Mortality Weekly Report: Surveillance Summaries</i> 1992; <b>41</b> : 1–13.                                                                                                                         | Scientific paper | No term                                                                                           |
| 103    | Immink M. Community-based food and nutrition surveillance as an instrument of socio-economic development in Central America: a point of view. <i>Food Nutr Bull</i> 1988; <b>10</b> : 13–5.                                                                                               | Scientific paper | Community-based food and nutrition surveillance                                                   |
| 104    | Jerome N, Ricci J. Food and nutrition surveillance: An international overview. <i>American Journal of Clinical Nutrition</i> 1997; <b>65</b> : 1198–1202.                                                                                                                                 | Scientific paper | Community food and nutrition surveillance                                                         |
| 105    | Mahmood S, Ayub M. Accuracy of primary health care statistics reported by community based lady health workers in district Lahore. <i>Journal of the Pakistan Medical Association</i> 2010; <b>60</b> : 649–53.                                                                            | Scientific paper | No term                                                                                           |
| 106    | BASICS II country report: Zambia. Arlington: Basic Support for Institutionalizing Child Survival Project (BASICS II) for the United States Agency for International Development, 2004.                                                                                                    | Report           | No term                                                                                           |
| 107    | Rosales A, Galindo J, Flores A. A community based surveillance system for maternal and early neonatal complications: the Intibuca case study. Baltimore: Catholic Relief Services, 2004.                                                                                                  | Report           | Community-based surveillance<br>Community-based health information system                         |
| 108    | Suva E. Gathering information for health. <i>World Health Forum</i> 1986; <b>7</b> : 340–4.                                                                                                                                                                                               | Scientific paper | No term                                                                                           |
| 109    | Curry D, Bisrat F, Coates E, Altman P. Reaching beyond the health post: Community-based surveillance for polio eradication. <i>Dev Pract</i> 2013; <b>23</b> : 69–78.                                                                                                                     | Scientific paper | Community-based surveillance                                                                      |
| 110    | Dalton C, Durrheim D, Fejsa J, Francis L, Carlson S, d'Espaignet ET, et al. Flutracking: a weekly Australian community online survey of influenza-like illness in 2006, 2007 and 2008. <i>Commun Dis Intell Q Rep</i> 2009; <b>33</b> : 316–22.                                           | Scientific paper | No term                                                                                           |
| 111    | Marquet RL, Bartelds AIM, van Noort SP, Koppeschaar CE, Paget J, Schellevis FG, et al. Internet-based monitoring of influenza-like illness (ILI) in the general population of the Netherlands during the 2003-2004 influenza season. <i>BMC Public Health</i> 2006; <b>6</b> : 242.       | Scientific paper | No term                                                                                           |
| 112    | Noort SP va., Muehlen M, Rebelo de Andrade H, Koppeschaar C, Lima Lourenço JM, Gomes MGM. Gripenet: an internet-based system to monitor influenza-like illness uniformly across Europe. <i>Euro Surveill</i> 2007; <b>12</b> : E5-6.                                                      | Scientific paper | No term                                                                                           |
| 113    | Tilston NL, Eames KTD, Paolotti D, Ealden T, Edmunds WJ. Internet-based surveillance of Influenza-like-illness in the UK during the 2009 H1N1 influenza pandemic. <i>BMC Public Health</i> 2010; <b>10</b> : 650.                                                                         | Scientific paper | No term                                                                                           |
| 114    | Informe: XIIa. Reunión Intergubernamental INCOSUR/Chagas. Santiago: Pan American Health Organization, 2003.                                                                                                                                                                               | Report           | No term                                                                                           |
| 115    | Villela MM, Souza JB, Mello VP, Azeredo BV de M, Dias JCP. Entomological surveillance for Chagas disease in the mid-western region of Minas Gerais State, Brazil, from 2000 to 2003. <i>Cad Saude Publica</i> 2005; <b>21</b> : 878–86.                                                   | Scientific paper | No term                                                                                           |
| 116    | Prata N, Gerdtz C, Gessesew A. An innovative approach to measuring maternal mortality at the community level in low-resource settings using mid-level providers: a feasibility study in Tigray, Ethiopia. <i>Reprod Health Matters</i> 2012; <b>20</b> : 196–204.                         | Scientific paper | Community-based sentinel surveillance                                                             |
| 117    | Jaravaza VS, McCoy MC, Dando BC. Unified National Health Information System. Part II. The Village Health Worker Health Information System. <i>Cent Afr J Med</i> 1982; <b>28</b> : 57–65.                                                                                                 | Scientific paper | Village health worker health information system                                                   |
| 118    | Valyasevi A, Winichagoon P, Dhanamitta S. Community-based surveillance for action towards health and nutrition: experience in Thailand. <i>Food and Nutrition Bulletin</i> 1995; <b>16</b> .                                                                                              | Scientific paper | Community-based nutrition surveillance                                                            |

| Doc Id | Reference                                                                                                                                                                                                                                                                 | Type of document  | Term used for CBS                                                                                         |
|--------|---------------------------------------------------------------------------------------------------------------------------------------------------------------------------------------------------------------------------------------------------------------------------|-------------------|-----------------------------------------------------------------------------------------------------------|
| 119    | Rehn M, Carnahan A, Merk H, Kühlmann-Berenzon S, Galanis I, Linde A, et al. Evaluation of an Internet-based monitoring system for influenza-like illness in Sweden. <i>PLoS ONE</i> 2014; <b>9</b> : e96740.                                                              | Scientific paper  | No term                                                                                                   |
| 120    | Ghebreyesus TA, Witten KH, Getachew A, Yohannes AM, Tesfay W, Minass M, et al. The community-based malaria control programme in Tigray, northern Ethiopia. A review of programme set-up, activities, outcomes and impact. <i>Parassitologia</i> 2000; <b>42</b> : 255–90. | Report            | Community-based surveillance                                                                              |
| 121    | Admon AJ, Bazile J, Makungwa H, Chingoli MA, Hirschhorn LR, Peckarsky M, et al. Assessing and improving data quality from community health workers: a successful intervention in Neno, Malawi. <i>Public Health Action</i> 2013; <b>3</b> : 56–9.                         | Scientific paper  | No term                                                                                                   |
| 122    | Merk H, Kühlmann-Berenzon S, Bexelius C, Sandin S, Litton J-E, Linde A, et al. The validity of self-initiated, event-driven infectious disease reporting in general population cohorts. <i>PLoS ONE</i> 2013; <b>8</b> : e61644.                                          | Scientific paper  | Population based surveillance                                                                             |
| 123    | Lamunu M, Lutwama JJ, Kamugisha J, Opio A, Namboozee J, Ndayimirije N, et al. Containing a haemorrhagic fever epidemic: the Ebola experience in Uganda (October 2000-January 2001). <i>Int J Infect Dis</i> 2004; <b>8</b> : 27–37.                                       | Scientific paper  | Community-based surveillance                                                                              |
| 124    | Ngabo F, Nguimfack J, Nwaigwe F, Mugeni C, Muhoza D, Wilson DR, et al. Designing and Implementing an Innovative SMS-based alert system (RapidSMS-MCH) to monitor pregnancy and reduce maternal and child deaths in Rwanda. <i>Pan Afr Med J</i> 2012; <b>13</b> :31.      | Scientific paper  | No term                                                                                                   |
| 125    | Community-based surveillance: guiding principles. Geneva: International Federation of Red Cross and Red Crescent Societies, 2017.                                                                                                                                         | Guidance document | Community-based surveillance<br>Community event-based surveillance<br>Community-based health surveillance |
| 126    | Wanderley DM. Entomological surveillance of Chagas' disease in the State of Sao Paulo. <i>Rev Saude Publica</i> 1991; <b>25</b> : 28–32.                                                                                                                                  | Scientific paper  | No term                                                                                                   |
| 127    | Qomariyah SN. A community-based surveillance system for maternal deaths in Indonesia. University of Aberdeen, 2013.                                                                                                                                                       | Thesis            | Community-based surveillance                                                                              |
| 128    | Brieger WR, Kendall C. Learning from local knowledge to improve disease surveillance: perceptions of the guinea worm illness experience. <i>Health Educ Res</i> 1992; <b>7</b> : 471–85.                                                                                  | Scientific paper  | Market-based case detection                                                                               |
| 129    | Ghebreyesus A, Alemayehu T, Bosma A, Hanna Witten K, Teklehaimanot A. Community participation in malaria control in Tigray region Ethiopia. <i>Acta Tropica</i> 1996; <b>61</b> : 145–56.                                                                                 | Scientific paper  | No term                                                                                                   |
| 130    | Issah K, Nartey K, Amoah R, Bachan EG, Aleeba J, Yeetey E, et al. Assessment of the usefulness of integrated disease surveillance and response on suspected ebola cases in the Brong Ahafo Region, Ghana. <i>Infect Dis Poverty</i> 2015; <b>4</b> : 17.                  | Scientific paper  | Community-based surveillance                                                                              |
| 131    | Bhatia S, Dranyi T, Rowley D. A social and demographic study of Tibetan refugees in India. <i>Soc Sci Med</i> 2002; <b>54</b> : 411–22.                                                                                                                                   | Scientific paper  | Community-based surveillance                                                                              |
| 132    | Sam-Abbenyi A, Dama M, Graham S, Obate Z. Dracunculiasis in Cameroon at the threshold of elimination. <i>Int J Epidemiol</i> 1999; <b>28</b> : 163–8.                                                                                                                     | Scientific paper  | No term                                                                                                   |
| 133    | Jones AH, Becknell S, Withers PC, Ruiz-Tiben E, Hopkins DR, Stobbeaar D, et al. Logistics of Guinea worm disease eradication in South Sudan. <i>Am J Trop Med Hyg</i> 2014; <b>90</b> : 393–401.                                                                          | Scientific paper  | Community-based surveillance                                                                              |
| 134    | Technical Guidelines for Integrated Disease Surveillance and Response in the African Region. Brazzaville: World Health Organization Regional Office for Africa and Centers for Disease Control and Prevention, 2010.                                                      | Guidance document | Community-based surveillance                                                                              |

# List and description of unique CBS systems identified

| CBS Id | Doc Id | Country    | Coverage      | Setting      | Start Year  | Status CBS | Ongoing or end year | Purpose of CBS System         | Scope                                         | Data collection actor     | Actor Selection Process         | Actor Training duration | Actor Payment / Incentives | Data Collection Method        | Data Reporting Method       | Data Reporting Frequency | Report Recipient                           |
|--------|--------|------------|---------------|--------------|-------------|------------|---------------------|-------------------------------|-----------------------------------------------|---------------------------|---------------------------------|-------------------------|----------------------------|-------------------------------|-----------------------------|--------------------------|--------------------------------------------|
| 1      | 110    | Australia  | Whole country | Rural; Urban | 2006        | Ongoing    | 2011                | Monitoring                    | Acute respiratory illness                     | General community members |                                 |                         |                            | Self collection and reporting | Online via website          | Weekly                   |                                            |
| 2      | 50, 53 | Bangladesh | Limited area  | Rural        | 2003 - 2004 | End        | 2005 - 2006         | Monitoring; Early detection   | Unspecified newborn illness                   | Locally recruited cadres  |                                 | 35 days                 |                            | House to house visit          | Visit to or from supervisor | Fortnight                | Non-government authority<br>Local level    |
| 3      | 89     | Bangladesh | Limited area  | Rural        | 1966        | Ongoing    | 1989                |                               | Unspecified disease or syndrome; Birth; Death | Locally recruited cadres  |                                 |                         |                            | House to house visit          |                             |                          |                                            |
| 4      | 55     | Benin      | Limited area  | Rural        | 2006        | End        | 2010                | Monitoring                    | Birth; Maternal death; Infant death           | Locally recruited cadres  | Local health care staffs select |                         |                            |                               |                             |                          | Government health authority<br>Local level |
| 5      | 115    | Brazil     | Limited area  | Urban        |             |            |                     | Early detection               | Triatomine bugs                               | General community members |                                 |                         |                            | Self collection and reporting |                             | Ad hoc                   | Government health authority<br>Local level |
| 6      | 90     | Brazil     | Limited area  | Rural, Urban | 1981        | Ongoing    | 1993                | Early detection               | Triatomine bugs                               | General community members |                                 |                         |                            | Self collection and reporting | Visit to or from supervisor | Ad hoc                   | Non-government authority<br>Local level    |
| 7      | 95     | Brazil     | Limited area  | Urban        | 2010        | End        | 2014                | Monitoring<br>Early detection | Triatomine bugs                               | General community members |                                 |                         |                            | Self collection and reporting | Visit to or from supervisor | Ad hoc                   | Government health authority<br>Local level |
| 8      | 126    | Brazil     | Limited area  |              | 1984        | Ongoing    | 1986                |                               | Triatomine bugs                               | General community members |                                 |                         |                            | Self collection and reporting | Visit to or from supervisor | Ad hoc                   |                                            |
| 9      | 87     | Brazil     | Whole country |              | 1998        | Ongoing    | 2005                |                               | Birth; Death                                  | Locally recruited cadres  |                                 |                         |                            | House to house visit          |                             | Monthly                  |                                            |
| 10     | 51     | Cambodia   | Limited area  | Rural        | 2010        | End        | 2011                | Monitoring                    | Malaria                                       | Locally recruited cadres  |                                 |                         |                            | Visit by community people     | Visit to or from supervisor |                          | Government health authority<br>Local level |

| CBS Id | Doc Id | Country                          | Coverage     | Setting            | Start Year | Status CBS | Ongoing or end year | Purpose of CBS System       | Scope                                                                                       | Data collection actor     | Actor Selection Process                                          | Actor Training duration | Actor Payment / Incentives        | Data Collection Method                                   | Data Reporting Method       | Data Reporting Frequency                       | Report Recipient                                  |
|--------|--------|----------------------------------|--------------|--------------------|------------|------------|---------------------|-----------------------------|---------------------------------------------------------------------------------------------|---------------------------|------------------------------------------------------------------|-------------------------|-----------------------------------|----------------------------------------------------------|-----------------------------|------------------------------------------------|---------------------------------------------------|
| 11     | 40, 60 | Cambodia                         | Limited area | Rural              | 2000       | Ongoing    | 2005                | Monitoring; Early detection | Malaria; Diarrhoeal disease; Measles; Viral haemorrhagic fever; Chronic cough; Birth; Death | Locally recruited cadres  | General community people select, Local health care staffs select | 3 days                  |                                   | House to house visit                                     | Visit to or from supervisor | Ad hoc, Monthly                                | Government health authority<br>Local level        |
| 12     | 132    | Cameroon                         | Limited area |                    | 1990       | End        | 1995                | Monitoring                  | Guinea-worm disease                                                                         | Locally recruited cadres  | General community people select                                  | 6 days                  | Paid                              |                                                          | Visit to or from supervisor | Weekly, Fortnight, Monthly, Every three months | Government health authority<br>Local level        |
| 13     | 39     | Chad                             | Limited area | Refugee settlement | 2004       |            |                     | Monitoring Early detection  | Birth; Death                                                                                | Locally recruited cadres  |                                                                  |                         |                                   | House to house visit, Notification from community people | Visit to or from supervisor | Weekly                                         | Non-government authority<br>Local level           |
| 14     | 59     | Democratic Republic of the Congo | Limited area |                    | 2011       | End        | 2011                |                             | Measles                                                                                     | Locally recruited cadres  |                                                                  |                         |                                   | House to house visit                                     |                             |                                                |                                                   |
| 15     | 3      | Democratic Republic of the Congo |              |                    | 2003       | End        | 2005                |                             | Nutritional status of children                                                              | Locally recruited cadres  | General community people select                                  |                         | Unpaid Programme-based allowances | Visit by community people                                |                             | Monthly                                        | Government health authority<br>Intermediary level |
| 16     | 47     | Ecuador                          | Limited area | Rural              |            |            |                     | Early detection             | Yaws                                                                                        | Locally recruited cadres  |                                                                  |                         |                                   |                                                          |                             | Ad hoc                                         | Government health authority<br>Local level        |
| 17     | 91     | El Salvador                      |              |                    | 2008       | Ongoing    | 2012                | Early detection             | Triatomine bugs                                                                             | General community members |                                                                  |                         |                                   | Self collection and reporting                            | Visit to or from supervisor | Ad hoc                                         | Government health authority<br>Local level        |

| CBS Id | Doc Id                     | Country                                                                                        | Coverage      | Setting      | Start Year | Status CBS | Ongoing or end year | Purpose of CBS System | Scope                                              | Data collection actor                                         | Actor Selection Process                                             | Actor Training duration | Actor Payment / Incentives                                                          | Data Collection Method                                  | Data Reporting Method       | Data Reporting Frequency | Report Recipient                                  |
|--------|----------------------------|------------------------------------------------------------------------------------------------|---------------|--------------|------------|------------|---------------------|-----------------------|----------------------------------------------------|---------------------------------------------------------------|---------------------------------------------------------------------|-------------------------|-------------------------------------------------------------------------------------|---------------------------------------------------------|-----------------------------|--------------------------|---------------------------------------------------|
| 18     | 29, 48, 111, 112, 113, 119 | Netherlands, Belgium, Portugal, Italy, United Kingdom, Sweden, France, Spain, Ireland, Denmark | Whole country | Rural; Urban | 2010       | End        | 2013                | Monitoring            | Acute respiratory illness                          | General community members                                     |                                                                     |                         |                                                                                     | Self collection and reporting                           | Online via website          | Weekly                   | Non-government authority<br>Central level         |
| 19     | 2, 9, 43, 109              | Ethiopia                                                                                       | Limited area  |              | 2003       | Ongoing    | 2014                | Monitoring            | Acute flaccid paralysis; Measles; Neonatal tetanus | Locally recruited cadres                                      | Prominent community people suggest, Local health care staffs select | 3 days                  | Unpaid Gowns, Umbrellas embossed with the project logo, Bags, Educational materials | House to house visit, Actively contact community people | Visit to or from supervisor | Ad hoc, Monthly          | Government health authority<br>Local level        |
| 20     | 67, 97                     | Ethiopia                                                                                       | Limited area  | Rural        | 2012       | End        | 2013                | Monitoring            | Birth; Death                                       | Locally recruited cadres                                      |                                                                     | 12 months               |                                                                                     |                                                         |                             | Monthly                  | Non-government authority<br>Local level           |
| 21     | 93                         | Ethiopia                                                                                       | Limited area  | Rural        | 1989       | End        | 1990                |                       | Birth; Death                                       | Locally recruited cadres                                      |                                                                     |                         | Paid                                                                                |                                                         |                             | Monthly                  | Government health authority<br>Local level        |
| 22     | 120, 129                   | Ethiopia                                                                                       | Limited area  | Rural        | 1992       | Ongoing    | 1999                | Monitoring            | Malaria                                            | Locally recruited cadres                                      | General community people select                                     | 7 days                  | Unpaid                                                                              |                                                         | Visit to or from supervisor | Weekly, Monthly          | Government health authority<br>Intermediary level |
| 23     | 116                        | Ethiopia                                                                                       | Limited area  | Rural        | 2010       | End        | 2011                | Monitoring            | Birth; Death                                       | Locally recruited cadres, Specific group of community members |                                                                     | 5 days                  |                                                                                     | Notification from community people                      |                             | Weekly                   | Government health authority<br>Local level        |

| CBS Id | Doc Id                          | Country   | Coverage      | Setting      | Start Year | Status CBS | Ongoing or end year | Purpose of CBS System       | Scope                                                                                                                                                                | Data collection actor               | Actor Selection Process                                                                                             | Actor Training duration | Actor Payment / Incentives                                                                                            | Data Collection Method                                   | Data Reporting Method                   | Data Reporting Frequency            | Report Recipient                           |
|--------|---------------------------------|-----------|---------------|--------------|------------|------------|---------------------|-----------------------------|----------------------------------------------------------------------------------------------------------------------------------------------------------------------|-------------------------------------|---------------------------------------------------------------------------------------------------------------------|-------------------------|-----------------------------------------------------------------------------------------------------------------------|----------------------------------------------------------|-----------------------------------------|-------------------------------------|--------------------------------------------|
| 24     | 5, 14, 25, 42, 46, 66, 78, ^130 | Ghana     | Whole country | Rural; Urban | 1997       | Ongoing    | 2015                | Monitoring; Early detection | Acute flaccid paralysis; Meningitis; Measles; Neonatal tetanus; Guinea-worm disease; Buruli Ulcer; Birth; Death; Maternal death; Infant death; Unusual health events | Locally recruited cadres            | Prominent community people select                                                                                   |                         | Unpaid Programme-based allowances                                                                                     | House to house visit, Notification from community people | Phone call, Visit to or from supervisor | Ad hoc, Weekly, Fortnight, Monthly, | Government health authority<br>Local level |
| 25     | 23, 91                          | Guatemala | Limited area  | Rural        | 2003       | Ongoing    | 2012                | Early detection             | Triatomine bugs                                                                                                                                                      | General community members           |                                                                                                                     |                         |                                                                                                                       | Self collection and reporting                            | Visit to or from supervisor             | Ad hoc                              | Government health authority<br>Local level |
| 26     | 32, 63, 64                      | Guatemala | Limited area  | Rural; Urban | 1958       | Ongoing    | 1992                | Monitoring; Early detection | Malaria                                                                                                                                                              | Locally recruited cadres            | Prominent community people suggest, General community people select, General community people select through voting | 2 days                  | Unpaid Christmas cards, Calendar, Preferential treatment in health care services, Exemption from yearly municipal tax | Visit by community people                                | Visit to or from supervisor             | Weekly                              | Government health authority<br>Local level |
| 27     | 125                             | Haiti     |               |              | 2014       |            |                     | Monitoring; Early detection | Diarrhoeal disease                                                                                                                                                   | Locally recruited cadres            |                                                                                                                     |                         |                                                                                                                       |                                                          | SMS                                     | Daily                               |                                            |
| 28     | 49, 91                          | Honduras  |               |              | 2008       | Ongoing    | 2012                | Early detection             | Triatomine bugs                                                                                                                                                      | General community members           |                                                                                                                     |                         |                                                                                                                       | Self collection and reporting                            | Visit to or from supervisor             | Ad hoc                              | Government health authority<br>Local level |
| 29     | 107                             | Honduras  | Limited area  |              | 1999       | Ongoing    | 2003                | Monitoring                  | Pregnancy complications; Neonatal death                                                                                                                              | Specific group of community members |                                                                                                                     | 3 days                  |                                                                                                                       |                                                          |                                         | Monthly                             | Non-government authority<br>Local level    |

| CBS Id | Doc Id | Country | Coverage     | Setting                        | Start Year | Status CBS | Ongoing or end year | Purpose of CBS System         | Scope                                                                                                                                                      | Data collection actor                                         | Actor Selection Process | Actor Training duration | Actor Payment / Incentives | Data Collection Method                                  | Data Reporting Method | Data Reporting Frequency | Report Recipient                             |
|--------|--------|---------|--------------|--------------------------------|------------|------------|---------------------|-------------------------------|------------------------------------------------------------------------------------------------------------------------------------------------------------|---------------------------------------------------------------|-------------------------|-------------------------|----------------------------|---------------------------------------------------------|-----------------------|--------------------------|----------------------------------------------|
| 30     | 13     | India   | Limited area |                                |            | Ongoing    | 2007                | Monitoring                    | Birth; Death                                                                                                                                               | Locally recruited cadres                                      |                         |                         |                            | House to house visit, Actively contact community people |                       |                          |                                              |
| 31     | 4      | India   | Limited area | Rural                          | 2005       | End        | 2005                | Monitoring; Early detection   | Diarrhoeal disease; Malaria; Measles; Viral haemorrhagic fever; Meningitis; Acute respiratory illness; Tuberculosis; Acute flaccid paralysis; Birth; Death | Specific group of community members                           |                         |                         |                            |                                                         |                       | Weekly                   | Government health authority<br>Local level   |
| 32     | 1      | India   | Limited area | Rural                          | 1980       | Ongoing    | 1987                | Monitoring<br>Early detection | Neonatal death                                                                                                                                             | Locally recruited cadres, Specific group of community members |                         |                         |                            | House to house visit                                    |                       |                          | Government health authority<br>Local level   |
| 33     | 92     | India   | Limited area | Rural                          | 1983       | Ongoing    | 2004                |                               | Birth; Death                                                                                                                                               | Locally recruited cadres                                      |                         |                         |                            |                                                         |                       | Ad hoc                   | Government health authority<br>Local level   |
| 34     | 65     | India   | Limited area |                                |            |            |                     | Early detection               | Unusual health events                                                                                                                                      | Locally recruited cadres                                      |                         |                         |                            | Notification from community people                      | Phone call            | Ad hoc                   | Government health authority<br>Local level   |
| 35     | 131    | India   | Limited area | Refugee settlement; Monastries | 1994       | Ongoing    | 1996                | Monitoring                    | Unspecified disease or syndrome; Birth; Death; Immunisation status of children                                                                             | Locally recruited cadres, Specific group of community members |                         |                         |                            | House to house visit                                    |                       | Every three months       | Government health authority<br>Central level |

| CBS Id | Doc Id             | Country   | Coverage      | Setting      | Start Year | Status CBS | Ongoing or end year | Purpose of CBS System       | Scope                                                | Data collection actor    | Actor Selection Process                                            | Actor Training duration | Actor Payment / Incentives                                               | Data Collection Method                                  | Data Reporting Method       | Data Reporting Frequency                       | Report Recipient                                                         |
|--------|--------------------|-----------|---------------|--------------|------------|------------|---------------------|-----------------------------|------------------------------------------------------|--------------------------|--------------------------------------------------------------------|-------------------------|--------------------------------------------------------------------------|---------------------------------------------------------|-----------------------------|------------------------------------------------|--------------------------------------------------------------------------|
| 36     | 26                 | Indonesia | Limited area  | Rural        | 1972       |            |                     |                             | Malaria; Smallpox; Diarrhoeal disease; Birth; Death; | Locally recruited cadres |                                                                    |                         |                                                                          | House to house visit, Actively contact community people |                             |                                                |                                                                          |
| 37     | 127                | Indonesia | Limited area  | Rural        | 2008       | End        | 2008                | Monitoring                  | Birth; Maternal death; Infant death                  | Locally recruited cadres |                                                                    |                         | Unpaid                                                                   |                                                         | Visit to or from supervisor |                                                | Government health authority, Government non-health authority Local level |
| 38     | 98                 | Indonesia | Whole country | Rural, Urban | 1984       | Ongoing    | 2016                |                             | Nutritional status of children                       | Locally recruited cadres |                                                                    |                         |                                                                          | Visit by community people                               |                             | Monthly                                        | Government health authority Local level                                  |
| 39     | 101                | Kenya     |               | Rural        |            |            |                     |                             | Birth; Death                                         | Locally recruited cadres |                                                                    |                         |                                                                          |                                                         |                             |                                                |                                                                          |
| 40     | 27, 61,            | Laos      | Whole country |              |            | Ongoing    | 2014                |                             | Malaria; Birth; Death                                | Locally recruited cadres | Prominent community people select, Local health care staffs select |                         | Unpaid Free health service, Programme-based allowances                   | Visit to or from supervisor                             |                             | Monthly                                        | Government health authority Local level, Intermediary level              |
| 41     | 8, 28, 33, 81, 121 | Malawi    | Whole country | Rural        | 1995       | Ongoing    | 2014                | Monitoring; Early detection | Unspecified disease or syndrome; Birth; Death        | Locally recruited cadres |                                                                    | 12 weeks                | Paid                                                                     | House to house visit                                    | Visit to or from supervisor | Monthly                                        |                                                                          |
| 42     | 67, 75             | Malawi    | Limited area  |              | 2010       | End        | 2013                | Monitoring                  | Birth; Death                                         | Locally recruited cadres |                                                                    |                         | Paid                                                                     |                                                         |                             | Monthly                                        |                                                                          |
| 43     | 24                 | Malaysia  | Limited area  |              | 1987       |            |                     | Early detection             | Malaria                                              | Locally recruited cadres | General community people select                                    |                         | Unpaid Merit certificate, Preferential treatment in health care services | Visit by community people                               | Visit to or from supervisor | Weekly, Fortnight, Monthly, Every three months | Government health authority Local level                                  |

| CBS Id | Doc Id  | Country    | Coverage      | Setting            | Start Year | Status CBS | Ongoing or end year | Purpose of CBS System | Scope                                                                                                                         | Data collection actor                                          | Actor Selection Process         | Actor Training duration | Actor Payment / Incentives | Data Collection Method        | Data Reporting Method       | Data Reporting Frequency | Report Recipient                               |
|--------|---------|------------|---------------|--------------------|------------|------------|---------------------|-----------------------|-------------------------------------------------------------------------------------------------------------------------------|----------------------------------------------------------------|---------------------------------|-------------------------|----------------------------|-------------------------------|-----------------------------|--------------------------|------------------------------------------------|
| 44     | 67, 82  | Mali       | Limited area  | Rural              | 2012       | End        | 2013                | Monitoring            | Birth; Death                                                                                                                  | Locally recruited cadres                                       |                                 | 3 days                  |                            |                               |                             | Monthly                  |                                                |
| 45     | 30      | Mozambique | Limited area  | Refugee settlement |            |            |                     |                       | Birth; Death; Immunisation status of children                                                                                 | Locally recruited cadres                                       |                                 |                         | Unpaid Tshirt              |                               | Visit to or from supervisor | Fortnight                | Non-government authority                       |
| 46     | 99      | Mozambique | Limited area  | Rural              | 2000       | End        | 2003                |                       | Unspecified disease or syndrome; Birth; Death                                                                                 | Locally recruited cadres                                       |                                 |                         |                            | House to house visit          |                             | Monthly                  | Government health authority<br>Local level     |
| 47     | 70, 77  | Nepal      | Limited area  | Rural              |            | Ongoing    | 2015                |                       | Unspecified disease or syndrome                                                                                               | Locally recruited cadres                                       |                                 |                         | Unpaid Travel allowances   |                               |                             | Twice a week             | Non-government authority<br>Local level        |
| 48     | 62      | Nepal      | Limited area  | Rural              |            |            |                     |                       | Birth                                                                                                                         | Locally recruited cadres                                       | General community people select |                         |                            |                               |                             |                          |                                                |
| 49     | 22, 128 | Nigeria    | Limited area  | Rural; Urban       | 1990       | End        | 1991                | Early detection       | Guinea-worm disease                                                                                                           | Locally recruited cadres                                       | General community people select |                         |                            |                               | Visit to or from supervisor | Weekly                   | Non-government authority                       |
| 50     | 105     | Pakistan   | Whole country |                    | 1994       | Ongoing    | 2008                | Monitoring            | Birth; Death; Maternal death; Infant death; Immunisation status of children; Low birth weight; Use of family planning methods | Locally recruited cadres                                       |                                 |                         |                            |                               |                             | Monthly                  | Government health authority<br>Local level     |
| 51     | 114     | Paraguay   |               |                    | 2002       | Ongoing    | 2003                |                       | Triatomine bugs                                                                                                               | Specific group of community members, General community members |                                 |                         |                            | Self collection and reporting |                             | Ad hoc                   | Government non-health authority<br>Local level |

| CBS Id | Doc Id                 | Country      | Coverage      | Setting      | Start Year | Status CBS | Ongoing or end year | Purpose of CBS System | Scope                                                                                                                                          | Data collection actor                               | Actor Selection Process                                             | Actor Training duration | Actor Payment / Incentives | Data Collection Method                                  | Data Reporting Method         | Data Reporting Frequency   | Report Recipient                           |
|--------|------------------------|--------------|---------------|--------------|------------|------------|---------------------|-----------------------|------------------------------------------------------------------------------------------------------------------------------------------------|-----------------------------------------------------|---------------------------------------------------------------------|-------------------------|----------------------------|---------------------------------------------------------|-------------------------------|----------------------------|--------------------------------------------|
| 52     | 108                    | Philippines  | Limited area  | Urban        | 1984       | Ongoing    | 1985                | Monitoring            | Unspecified disease or syndrome; Birth; Death; Use of family planning methods; Nutritional status of children; Immunisation status of children | Locally recruited cadres, General community members |                                                                     |                         |                            | Self collection and reporting                           | Visit to or from supervisor   | Weekly, Every three months | Government health authority<br>Local level |
| 53     | 12                     | Rwanda       | Whole country | Rural        | 2004       | Ongoing    | 2006                | Early detection       | Nutritional status of children                                                                                                                 | Locally recruited cadres                            |                                                                     | 3-5 days                | Unpaid                     | Visit by community people                               |                               |                            |                                            |
| 54     | 124                    | Rwanda       | Limited area  |              | 2010       | Ongoing    | 2012                | Early detection       | Maternal death; Infant death; Pregnancy complications                                                                                          | Locally recruited cadres                            |                                                                     | 2 days                  | Unpaid                     |                                                         | SMS                           | Ad hoc                     |                                            |
| 55     | 71                     | Rwanda       | Whole country | Rural        |            | Ongoing    | 2012                |                       | Tuberculosis; Death; Nutritional status of children; Use of family planning methods                                                            | Locally recruited cadres                            |                                                                     |                         |                            | House to house visit                                    |                               | Monthly                    |                                            |
| 56     | 58                     | Senegal      | Limited area  |              | 2006       |            |                     |                       | Birth; Death; Maternal death; Neonatal death                                                                                                   | Locally recruited cadres                            |                                                                     |                         |                            | House to house visit                                    | SMS, Mobile phone application | Ad hoc                     | Non-government authority                   |
| 57     | 17, 20, 21, 41, 74, 83 | Sierra Leone | Limited area  | Rural; Urban | 2015       | Ongoing    | 2015                | Early detection       | Viral haemorrhagic fever                                                                                                                       | Locally recruited cadres                            | Prominent community people suggest, Local health care staffs select |                         | Unpaid Travel allowances   | House to house visit, Actively contact community people | Phone call                    | Ad hoc                     | Non-government authority<br>Local level    |

| CBS Id | Doc Id  | Country      | Coverage     | Setting      | Start Year | Status CBS | Ongoing or end year | Purpose of CBS System       | Scope                                                        | Data collection actor     | Actor Selection Process           | Actor Training duration | Actor Payment / Incentives                                                          | Data Collection Method                                  | Data Reporting Method          | Data Reporting Frequency | Report Recipient                               |
|--------|---------|--------------|--------------|--------------|------------|------------|---------------------|-----------------------------|--------------------------------------------------------------|---------------------------|-----------------------------------|-------------------------|-------------------------------------------------------------------------------------|---------------------------------------------------------|--------------------------------|--------------------------|------------------------------------------------|
| 58     | 125     | Sierra Leone | Limited area |              | 2015       | Ongoing    | 2017                | Monitoring; Early detection | Viral haemorrhagic fever; Diarrhoeal disease; Measles; Death | Locally recruited cadres  |                                   |                         |                                                                                     |                                                         | SMS                            | Ad hoc                   | Non-government authority<br>Local level        |
| 59     | 19, 133 | South Sudan  | Limited area | Rural        | 2006       | Ongoing    | 2012                | Monitoring; Early detection | Guinea-worm disease                                          | Locally recruited cadres  |                                   |                         |                                                                                     | House to house visit                                    | Visit to or from supervisor    | Daily, Weekly            | Government health authority<br>Local level     |
| 60     | 43      | South Sudan  | Limited area | Rural        | 2010       | Ongoing    | 2015                | Monitoring                  | Acute flaccid paralysis; Measles; Neonatal tetanus           | Locally recruited cadres  |                                   |                         | Unpaid Gowns, Umbrellas embossed with the project logo, Bags, Educational materials | House to house visit, Actively contact community people |                                | Monthly                  | Government health authority<br>Local level     |
| 61     | 73      | Sweden       | Limited area | Rural; Urban | 2013       | End        | 2014                | Monitoring                  | Diarrhoeal disease; Acute respiratory illness                | General community members |                                   |                         |                                                                                     | Self collection and reporting                           | Online via website             | Weekly                   | Government health authority<br>Central level   |
| 62     | 122     | Sweden       | Limited area | Urban        | 2007       | Ongoing    | 2009                | Monitoring                  | Acute respiratory illness                                    | General community members |                                   |                         |                                                                                     | Self collection and reporting                           | Online via website, Phone call | Ad hoc, Weekly           |                                                |
| 63     | 37, 80  | Tanzania     | Limited area | Urban        | 2004       | Ongoing    | 2012                | Monitoring Early detection  | Mosquito and its habitat                                     | Locally recruited cadres  | Prominent community people select |                         | Paid                                                                                | House to house visit                                    |                                | Daily, Weekly            | Government non-health authority<br>Local level |
| 64     | 7       | Tanzania     | Limited area | Rural        |            |            |                     | Monitoring                  | Maternal death; Neonatal death; Infant death                 | Locally recruited cadres  |                                   |                         |                                                                                     |                                                         |                                |                          |                                                |
| 65     | 76      | Tanzania     | Limited area | Rural        | 1983       | End        | 1989                | Monitoring                  | Nutritional status of children; Under-five death             | Locally recruited cadres  |                                   |                         |                                                                                     |                                                         |                                |                          | Government non-health authority<br>Local level |

| CBS Id | Doc Id   | Country  | Coverage      | Setting | Start Year | Status CBS | Ongoing or end year | Purpose of CBS System       | Scope                          | Data collection actor                                         | Actor Selection Process                                                         | Actor Training duration | Actor Payment / Incentives | Data Collection Method                                   | Data Reporting Method      | Data Reporting Frequency                  | Report Recipient                                                                             |
|--------|----------|----------|---------------|---------|------------|------------|---------------------|-----------------------------|--------------------------------|---------------------------------------------------------------|---------------------------------------------------------------------------------|-------------------------|----------------------------|----------------------------------------------------------|----------------------------|-------------------------------------------|----------------------------------------------------------------------------------------------|
| 66     | 31       | Tanzania | Limited area  | Rural   |            |            |                     |                             | Birth; Death                   | Locally recruited cadres                                      | General community people select, General community people select through voting | 9 months                |                            |                                                          |                            |                                           |                                                                                              |
| 67     | 10       | Thailand | Whole country | Rural   | 1961       | Ongoing    | 1989                | Monitoring; Early detection | Malaria                        | Locally recruited cadres                                      |                                                                                 |                         |                            | Visit by community people                                |                            |                                           |                                                                                              |
| 68     | 86       | Thailand | Whole country | Rural   | 2004       | Ongoing    | 2007                | Early detection             | Acute respiratory illness      | Locally recruited cadres                                      | Prominent community people suggest, Local health care staffs select             | 23 days                 | Unpaid Free health service | House to house visit, Notification from community people | Phone call, Wireless radio | Ad hoc, Daily, Fortnight                  | Government health authority Local level                                                      |
| 69     | 104, 118 | Thailand | Whole country | Rural   | 1982       | Ongoing    | 1995                | Monitoring                  | Nutritional status of children | Locally recruited cadres, Specific group of community members |                                                                                 |                         |                            | Visit by community people                                |                            | Monthly, Every three months, Twice a year | Government health authority, Government non-health authority Local level, Intermediary level |
| 70     | 57       | Thailand | Limited area  | Rural   |            |            |                     |                             | Diarrhoeal disease             | Locally recruited cadres                                      |                                                                                 |                         |                            | House to house visit, Notification from community people |                            |                                           |                                                                                              |
| 71     | 88       | Tunisia  | Limited area  | Rural   | 2009       | Ongoing    | 2014                |                             | Cutaneous Leishmaniasis        | Specific group of community members                           |                                                                                 |                         |                            |                                                          |                            |                                           | Government health authority Local level                                                      |
| 72     | 34       | Uganda   | Limited area  | Rural   |            |            |                     | Monitoring                  | Unspecified newborn illness    | Locally recruited cadres                                      | General community people select                                                 | 5 days                  | Unpaid                     | House to house visit                                     |                            |                                           | Government health authority Local level                                                      |

| CBS Id | Doc Id | Country       | Coverage      | Setting      | Start Year | Status CBS | Ongoing or end year | Purpose of CBS System | Scope                                                                         | Data collection actor                                                                    | Actor Selection Process         | Actor Training duration | Actor Payment / Incentives | Data Collection Method                                                                  | Data Reporting Method       | Data Reporting Frequency | Report Recipient                                                     |
|--------|--------|---------------|---------------|--------------|------------|------------|---------------------|-----------------------|-------------------------------------------------------------------------------|------------------------------------------------------------------------------------------|---------------------------------|-------------------------|----------------------------|-----------------------------------------------------------------------------------------|-----------------------------|--------------------------|----------------------------------------------------------------------|
| 73     | 123    | Uganda        | Limited area  | Rural        | 2000       | Ongoing    | 2002                | Early detection       | Measles; Meningitis; Viral haemorrhagic fever                                 | Locally recruited cadres, Specific group of community members                            |                                 |                         |                            |                                                                                         |                             | Ad hoc                   | Government health authority<br>Intermediary level                    |
| 74     | 52     | United States | Limited area  | Rural        | 2006       | Ongoing    | 2014                | Early detection       | Suicidal and self-injurious behavior                                          | General community members                                                                |                                 |                         |                            | Notification from community people                                                      | Phone call, Fax             | Ad hoc                   | Non-government authority<br>Central level                            |
| 75     | 56     | Vanuatu       | Limited area  | Rural        | 1992       | Ongoing    | 2010                | Early detection       | Malaria                                                                       | Locally recruited cadres                                                                 |                                 |                         |                            |                                                                                         |                             |                          |                                                                      |
| 76     | 44     | Vietnam       |               | Rural        | 2007       |            |                     | Early detection       | Acute respiratory illness                                                     | Locally recruited cadres                                                                 |                                 |                         |                            | House to house visit                                                                    | Visit to or from supervisor | Monthly                  | Government health authority<br>Local level                           |
| 77     | 68     | Zambia        | Limited area  | Rural; Urban |            | Ongoing    | 2014                | Monitoring            | Malaria                                                                       | Locally recruited cadres                                                                 |                                 | 2-4 days                |                            | House to house visit                                                                    | Mobile phone application    | Ad hoc                   | Government health authority<br>Intermediary level                    |
| 78     | 100    | Zambia        | Limited area  | Rural        | 1982       |            |                     | Monitoring            | Unspecified disease or syndrome; Birth; Death; Nutritional status of children | Locally recruited cadres, Specific group of community members, General community members |                                 |                         |                            | House to house visit, Notification from community people, Self collection and reporting |                             | Monthly, Twice a year    | Government health authority, Non-government authority<br>Local level |
| 79     | 117    | Zimbabwe      | Whole country | Rural        |            | Ongoing    | 1981                |                       | Unspecified disease or syndrome; Birth; Death                                 | Locally recruited cadres                                                                 | General community people select | 8 weeks                 |                            |                                                                                         |                             | Monthly                  | Government health authority<br>Local level                           |
